# Supplementary material for: X-ray diffraction and computational studies of the pressure-dependent tetrachloroethane solvation of diphenylanthracene
Source: Royal Society of Chemistry journal article supplement (doi:10.1039/c6ce00055j), 2016-01-01
Supplement: c6ce00055j1.pdf [file c6ce00055j1.pdf]

# **X-ray diffraction and computational studies of the pressure-dependent diphenylanthracene-tetrachloroethane solvation**

## **ELECTRONIC SUPPLEMENTARY INFORMATION**

Francesca P. A. Fabbiani, Stefano Bergantin, Angelo Gavezzotti, Silvia Rizzato and Massimo Moret

ffabbia@gwdg.de  
massimo.moret@unimib.it

### **Contents**

|                                                |          |
|------------------------------------------------|----------|
| <b>Experimental .....</b>                      | <b>2</b> |
| Raman spectra .....                            | 2        |
| GRADE-restraints .....                         | 3        |
| CheckCIF report .....                          | 3        |
| <b>Structural and energetic features .....</b> | <b>8</b> |

## Experimental

### Raman spectra

A single crystal of DPA grown from 1,1,2,2-tetrachloroethane was loaded in the DAC using a 4:1 MeOH/EtOH solution as pressure transmitting medium. Raman spectra were collected at 0.03 GPa intervals up to 3.0 GPa using a Horiba Jobin Yvon HR800 UV Micro-Raman spectrometer equipped with an air-cooled 325 mW 785 nm diode laser. This particular laser was chosen in order to minimise the otherwise considerable fluorescence signal from the sample. Raman spectra were collected in the 150-1800  $\text{cm}^{-1}$  range with a spectral resolution of ca. 2.2  $\text{cm}^{-1}$  using a grating of 600 grooves/mm and a Peltier-cooled CCD detector (Andor,  $1024 \times 256$  pixels). No phase transition was observed up to 3.0 GPa.

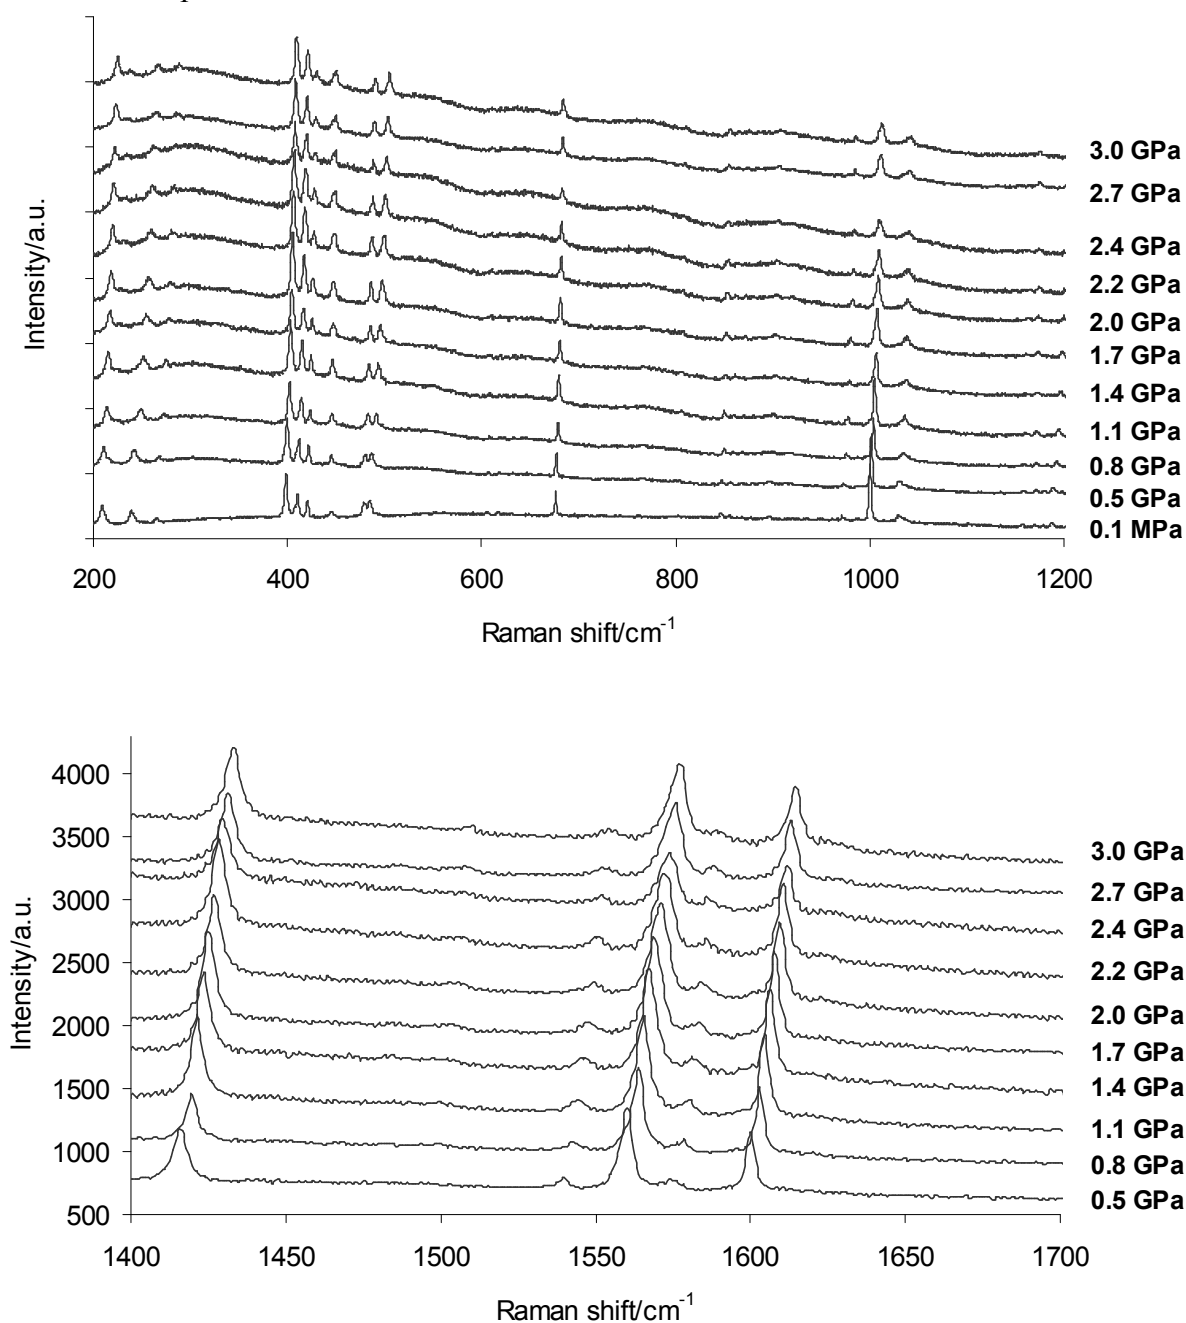

**Fig. S1.** Selected wavenumber regions of Raman spectra of DPA at ambient temperature contained in a DAC and compressed to 3.0 GPa using a 4:1 MeOH/EtOH solution as pressure transmitting medium. The region around the first-order peak of diamond at ca. 1330  $\text{cm}^{-1}$  is not shown.

## GRADE-restraints

Please refer to grade-XXX\_dpa.dfix and grade-XXX\_solvent.dfix files

## CheckCIF reports

Please note that responses to CheckCIF alerts are embedded in the respective CIF files under \_refine\_special\_details.

checkCIF/PLATON report (basic structural check)

No syntax errors found.

Please wait while processing ....

[CIF dictionary](#)

[Interpreting this report](#)

## Datablock: diphenylanthracene\_TTCE\_solvate\_0p5\_GPa

---

|                        |                                                |                                 |
|------------------------|------------------------------------------------|---------------------------------|
| Bond precision:        | C-C = 0.0136 Å                                 | Wavelength=0.71073              |
| Cell:                  | a=8.7874 (3)    b=12.0308 (7)    c=13.8215 (8) |                                 |
|                        | alpha=90    beta=104.964 (3)    gamma=90       |                                 |
| Temperature:           | 296 K                                          |                                 |
|                        | Calculated                                     | Reported                        |
| Volume                 | 1411.65 (13)                                   | 1411.65 (13)                    |
| Space group            | P 21/c                                         | P 21/c                          |
| Hall group             | -P 2ybc                                        | -P 2ybc                         |
| Moiety formula         | C26 H18, 2 (C2 H2 Cl4)                         | C26 H18, 2 (C2 H2 Cl4)          |
| Sum formula            | C30 H22 Cl8                                    | C30 H22 Cl8                     |
| Mr                     | 666.08                                         | 666.07                          |
| Dx, g cm <sup>-3</sup> | 1.567                                          | 1.567                           |
| Z                      | 2                                              | 2                               |
| Mu (mm <sup>-1</sup> ) | 0.819                                          | 0.819                           |
| F000                   | 676.0                                          | 676.0                           |
| F000'                  | 678.54                                         |                                 |
| h, k, lmax             | 7, 10, 11                                      | 7, 9, 11                        |
| Nref                   | 862                                            | 650                             |
| Tmin, Tmax             | 0.921, 0.937                                   | 0.745, 0.862                    |
| Tmin'                  | 0.921                                          |                                 |
| Correction method=     | # Reported T Limits: Tmin=0.745                |                                 |
| Tmax=0.862 AbsCorr =   | MULTI-SCAN                                     |                                 |
| Data completeness=     | 0.754                                          | Theta(max)= 17.284              |
| R(reflections)=        | 0.0515 ( 504)                                  | wR2(reflections)= 0.1314 ( 650) |
| S =                    | 1.062                                          | Npar= 172                       |

---

The following ALERTS were generated. Each ALERT has the format

**test-name\_ALERT\_alert-type\_alert-level.**

Click on the hyperlinks for more details of the test.

---

### **Alert level A**

[REFNR01 ALERT 3 A](#) Ratio of reflections to parameters is < 6 for a centrosymmetric structure

sine(theta)/lambda 0.4180

Proportion of unique data used 1.0000

Ratio reflections to parameters 3.7791

[THETM01 ALERT 3 A](#) The value of sine(theta\_max)/wavelength is less than 0.550

Calculated sin(theta\_max)/wavelength = 0.4180

[PLAT029 ALERT 3 A](#) \_diffn\_measured\_fraction\_theta\_full Low ..... 0.754 Note

[PLAT088 ALERT 3 A](#) Poor Data / Parameter Ratio ..... 5.01 Note

PLAT340 ALERT 3 B Low Bond Precision on C-C Bonds ..... 0.01362 Ang.

Alert level C

|                          |     |                                           |      |
|--------------------------|-----|-------------------------------------------|------|
| <u>PLAT244 ALERT 4 C</u> | Low | 'Solvent' Ueq as Compared to Neighbors of | C1CL |
| Check                    |     |                                           |      |

Alert level G

|                         |                       |                   |                   |                                                  |      |        |
|-------------------------|-----------------------|-------------------|-------------------|--------------------------------------------------|------|--------|
| <a href="#">PLAT002</a> | <a href="#">ALERT</a> | <a href="#">2</a> | <a href="#">G</a> | Number of Distance or Angle Restraints on AtSite | 19   | Note   |
| <a href="#">PLAT003</a> | <a href="#">ALERT</a> | <a href="#">2</a> | <a href="#">G</a> | Number of Uiso or Uij Restrained non-H Atoms ... | 19   | Report |
| <a href="#">PLAT083</a> | <a href="#">ALERT</a> | <a href="#">2</a> | <a href="#">G</a> | SHELXL Second Parameter in WGHT Unusually Large  | 6.55 | Why ?  |
| <a href="#">PLAT720</a> | <a href="#">ALERT</a> | <a href="#">4</a> | <a href="#">G</a> | Number of Unusual/Non-Standard Labels .....      | 4    | Note   |
| <a href="#">PLAT860</a> | <a href="#">ALERT</a> | <a href="#">3</a> | <a href="#">G</a> | Number of Least-Squares Restraints .....         | 172  | Note   |

```
4 ALERT level A = Most likely a serious problem - resolve or explain
1 ALERT level B = A potentially serious problem, consider carefully
1 ALERT level C = Check. Ensure it is not caused by an omission or oversight
5 ALERT level G = General information/check it is not something unexpected
```

```
0 ALERT type 1 CIF construction/syntax error, inconsistent or missing data
3 ALERT type 2 Indicator that the structure model may be wrong or deficient
6 ALERT type 3 Indicator that the structure quality may be low
2 ALERT type 4 Improvement, methodology, query or suggestion
0 ALERT type 5 Informative message, check
```

**PLATON version of 19/11/2015; check.def file version of 17/11/2015**

**Datablock diphenylanthracene\_TTCE\_solvate\_0p5\_GPa - ellipsoid plot**

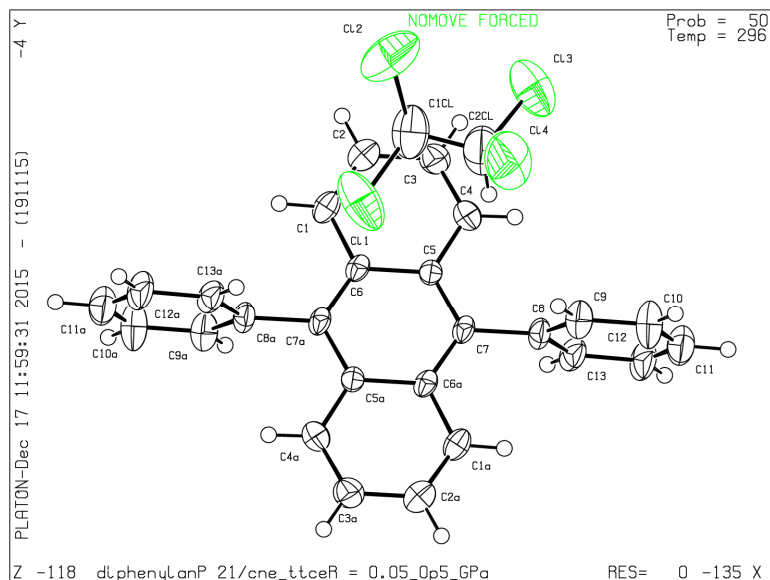

# Datablock: diphenylanthracene\_0p5\_GPa

---

Bond precision: C-C = 0.0031 Å Wavelength=0.71073  
Cell: a=10.4702(9) b=13.3923(10) c=12.0158(11)  
alpha=90 beta=89.931(8) gamma=90  
Temperature: 296 K

|                        | Calculated   | Reported     |
|------------------------|--------------|--------------|
| Volume                 | 1684.9(2)    | 1684.9(2)    |
| Space group            | C 2/c        | C 2/c        |
| Hall group             | -C 2yc       | -C 2yc       |
| Moiety formula         | C26 H18      | C26 H18      |
| Sum formula            | C26 H18      | C26 H18      |
| Mr                     | 330.40       | 330.40       |
| Dx, g cm <sup>-3</sup> | 1.303        | 1.303        |
| Z                      | 4            | 4            |
| Mu (mm <sup>-1</sup> ) | 0.074        | 0.074        |
| F000                   | 696.0        | 696.0        |
| F000'                  | 696.26       |              |
| h, k, lmax             | 12, 16, 14   | 11, 15, 12   |
| Nref                   | 1553         | 937          |
| Tmin, Tmax             | 0.987, 0.994 | 0.794, 0.884 |
| Tmin'                  | 0.985        |              |

Correction method= # Reported T Limits: Tmin=0.794  
Tmax=0.884 AbsCorr = MULTI-SCAN  
Data completeness= 0.603 Theta(max)= 25.337  
R(reflections)= 0.0365( 765) wR2(reflections)= 0.0954( 937)  
S = 1.101 Npar= 119

---

The following ALERTS were generated. Each ALERT has the format

**test-name\_ALERT\_alert-type\_alert-level.**

Click on the hyperlinks for more details of the test.

---

## 🔴Alert level A

[PLAT029 ALERT 3 A](#) \_diffrn\_measured\_fraction\_theta\_full Low ..... 0.607 Note

---

## 🟡Alert level C

[PLAT157 ALERT 4 C](#) Non-standard Monoclinic Beta Angle less 90 Deg 89.93 Degree

---

## 🟢Alert level G

|                                   |                                                  |              |
|-----------------------------------|--------------------------------------------------|--------------|
| <a href="#">PLAT002 ALERT 2 G</a> | Number of Distance or Angle Restraints on AtSite | 13 Note      |
| <a href="#">PLAT003 ALERT 2 G</a> | Number of Uiso or Uij Restrained non-H Atoms ... | 13 Report    |
| <a href="#">PLAT158 ALERT 4 G</a> | The Input Unitcell is NOT Standard/Reduced ..... | Please Check |
| <a href="#">PLAT860 ALERT 3 G</a> | Number of Least-Squares Restraints .....         | 128 Note     |
| <a href="#">PLAT952 ALERT 5 G</a> | Calculated (ThMax) and CIF-Reported Lmax Differ  | 2            |

Units

- 
- 1 **ALERT level A** = Most likely a serious problem - resolve or explain  
0 **ALERT level B** = A potentially serious problem, consider carefully  
1 **ALERT level C** = Check. Ensure it is not caused by an omission or oversight  
5 **ALERT level G** = General information/check it is not something unexpected
- 0 ALERT type 1 CIF construction/syntax error, inconsistent or missing data  
2 ALERT type 2 Indicator that the structure model may be wrong or deficient  
2 ALERT type 3 Indicator that the structure quality may be low  
2 ALERT type 4 Improvement, methodology, query or suggestion  
1 ALERT type 5 Informative message, check
-

## Datablock diphenylanthracene\_0p5\_GPa - ellipsoid plot

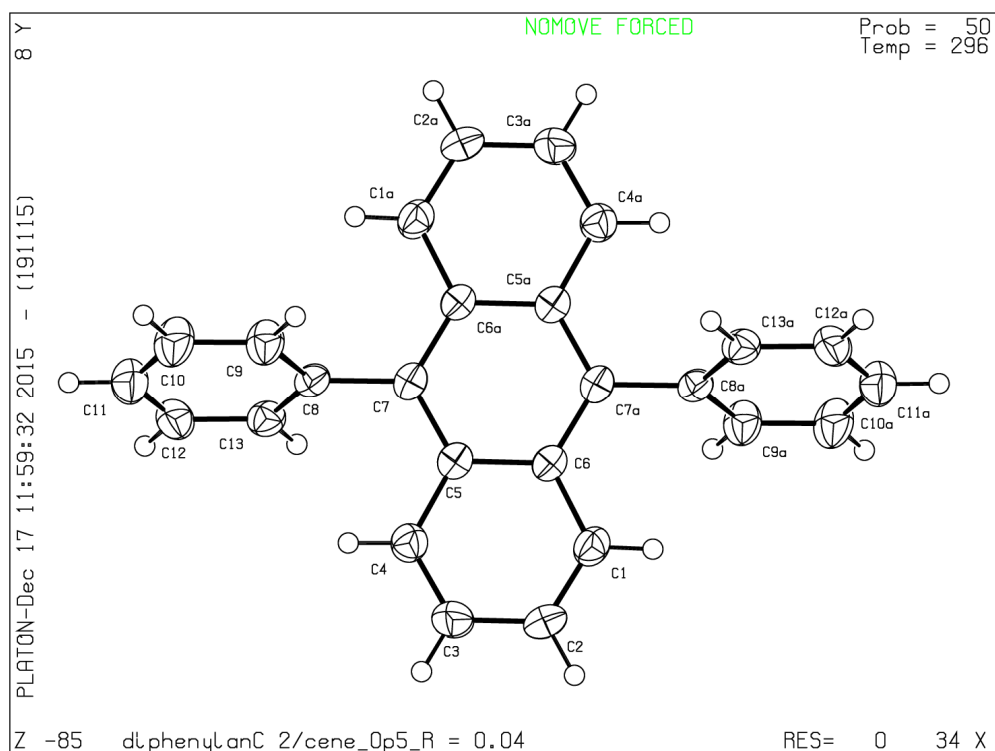

## Datablock: diphenylanthracene\_3\_GPa

Bond precision: C-C = 0.0089 Å Wavelength=0.71073

Cell: a=10.041(2) b=13.150(2) c=11.378(2)  
alpha=90 beta=88.483(17) gamma=90

Temperature: 296 K

|                        | Calculated                      | Reported                        |
|------------------------|---------------------------------|---------------------------------|
| Volume                 | 1501.8(5)                       | 1501.8(5)                       |
| Space group            | C 2/c                           | C 2/c                           |
| Hall group             | -C 2yc                          | -C 2yc                          |
| Moiety formula         | C <sub>26</sub> H <sub>18</sub> | C <sub>26</sub> H <sub>18</sub> |
| Sum formula            | C <sub>26</sub> H <sub>18</sub> | C <sub>26</sub> H <sub>18</sub> |
| Mr                     | 330.40                          | 330.40                          |
| Dx, g cm <sup>-3</sup> | 1.461                           | 1.461                           |
| Z                      | 4                               | 4                               |
| Mu (mm <sup>-1</sup> ) | 0.083                           | 0.083                           |
| F <sub>000</sub>       | 696.0                           | 696.0                           |
| F <sub>000</sub> '     | 696.26                          |                                 |
| h, k, lmax             | 9, 12, 10                       | 8, 12, 10                       |
| Nref                   | 687                             | 422                             |
| Tmin, Tmax             | 0.985, 0.993                    | 0.525, 0.884                    |
| Tmin'                  | 0.984                           |                                 |

Correction method= # Reported T Limits: Tmin=0.525  
Tmax=0.884 AbsCorr = MULTI-SCAN

Data completeness= 0.614 Theta(max)= 19.779

R(reflections)= 0.0528( 308) wR2(reflections)= 0.1475( 422)

S = 1.058 Npar= 119

The following ALERTS were generated. Each ALERT has the format

**test-name\_ALERT\_alert-type\_alert-level.**

Click on the hyperlinks for more details of the test.

### Alert level A

|                                   |                                                                           |                      |
|-----------------------------------|---------------------------------------------------------------------------|----------------------|
| <a href="#">REFNR01 ALERT 3 A</a> | Ratio of reflections to parameters is < 6 for a centrosymmetric structure |                      |
|                                   | sine(theta)/lambda                                                        | 0.4761               |
|                                   | Proportion of unique data used                                            | 1.0000               |
|                                   | Ratio reflections to parameters                                           | 3.5462               |
| <a href="#">THETM01 ALERT 3 A</a> | The value of sine(theta_max)/wavelength is less than 0.550                |                      |
|                                   | Calculated sin(theta_max)/wavelength =                                    | 0.4761               |
| <a href="#">PLAT029 ALERT 3 A</a> | _diffraction_measured_fraction_theta_full                                 | Low ..... 0.614 Note |
| <a href="#">PLAT088 ALERT 3 A</a> | Poor Data / Parameter Ratio                                               | ..... 5.77 Note      |

### Alert level C

|                                   |                                                |                   |
|-----------------------------------|------------------------------------------------|-------------------|
| <a href="#">PLAT031 ALERT 4 C</a> | Refined Extinction Parameter within Range      | ..... 2.750 Sigma |
| <a href="#">PLAT157 ALERT 4 C</a> | Non-standard Monoclinic Beta Angle less 90 Deg | 88.48 Degree      |
| <a href="#">PLAT340 ALERT 3 C</a> | Low Bond Precision on C-C Bonds                | ..... 0.00887     |

Ang.

### Alert level G

|                                   |                                                  |                    |
|-----------------------------------|--------------------------------------------------|--------------------|
| <a href="#">PLAT002 ALERT 2 G</a> | Number of Distance or Angle Restraints on AtSite | 13 Note            |
| <a href="#">PLAT003 ALERT 2 G</a> | Number of Uiso or Uij Restrained non-H Atoms     | ... 13 Report      |
| <a href="#">PLAT072 ALERT 2 G</a> | SHELXL First Parameter in WGHT Unusually Large   | 0.11 Report        |
| <a href="#">PLAT158 ALERT 4 G</a> | The Input Unitcell is NOT Standard/Reduced       | ..... Please Check |
| <a href="#">PLAT432 ALERT 2 G</a> | Short Inter X...Y Contact C12 .. C12 ..          | 3.16 Ang.          |
| <a href="#">PLAT860 ALERT 3 G</a> | Number of Least-Squares Restraints               | ..... 128 Note     |

- 4 **ALERT level A** = Most likely a serious problem - resolve or explain  
 0 **ALERT level B** = A potentially serious problem, consider carefully  
 3 **ALERT level C** = Check. Ensure it is not caused by an omission or oversight  
 6 **ALERT level G** = General information/check it is not something unexpected
- 0 ALERT type 1 CIF construction/syntax error, inconsistent or missing data  
 4 ALERT type 2 Indicator that the structure model may be wrong or deficient  
 6 ALERT type 3 Indicator that the structure quality may be low  
 3 ALERT type 4 Improvement, methodology, query or suggestion  
 0 ALERT type 5 Informative message, check

## Datablock diphenylanthracene\_3\_GPa - ellipsoid plot

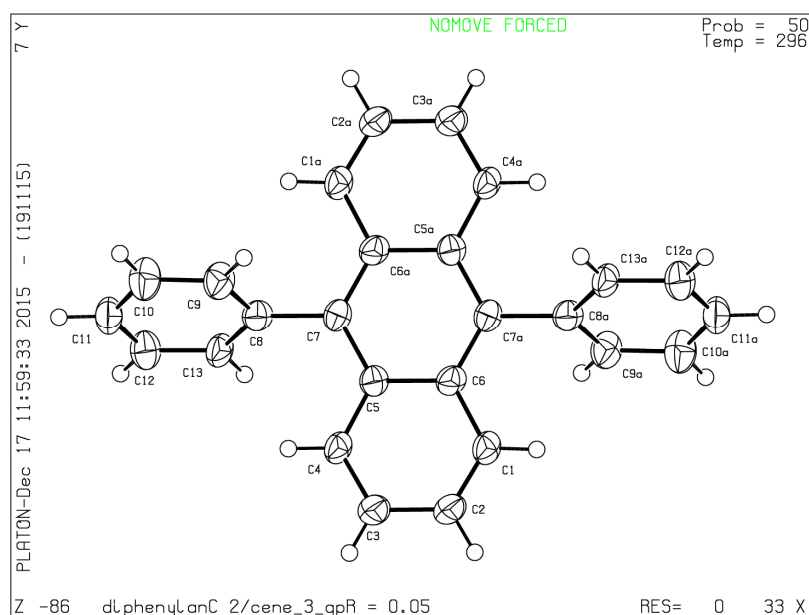

## Structural and energetic features

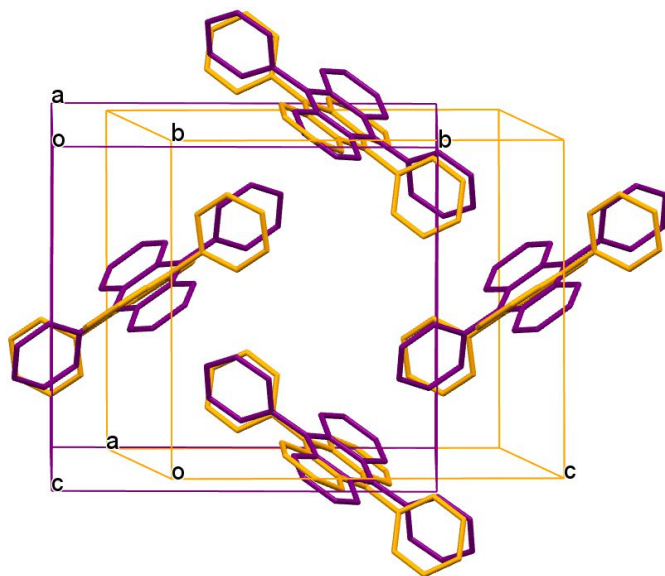

**Fig. S2.** Overlay of (100) molecular layers in DPA (purple) and DPA-S (orange). H-atoms and solvent molecules have been omitted for clarity. The arrangement of the molecules in the (100) plane of DPA-S is similarly present in the first (100) layer of the structure of DPA. DPA and DPA-S have in fact almost identical *b* and *c* axes, but a different orientation of the cell (the axes are swapped in the two structures, see Table 1 in the main manuscript). The widening of the  $\beta$  angle in DPA-S (formerly  $\gamma = 90^\circ$  in DPA) together with the length reduction of the *a*-axis prevent the formation of the second layer of DPA molecules, which is replaced by solvent molecules.

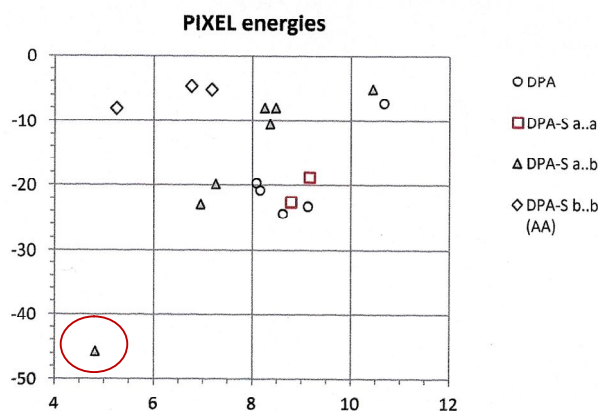

**Fig. S3** Molecule-molecule pair energies in  $\text{kJ mol}^{-1}$  as a function of distance between centres of mass in  $\text{\AA}$ . Circles: DPA-DPA in the unsolvated crystal; red squares, *id.* in the solvate; triangles DPA-solvent interactions; diamonds, solvent-solvent interactions. The red circle highlights the dominating solute-solvent interaction.



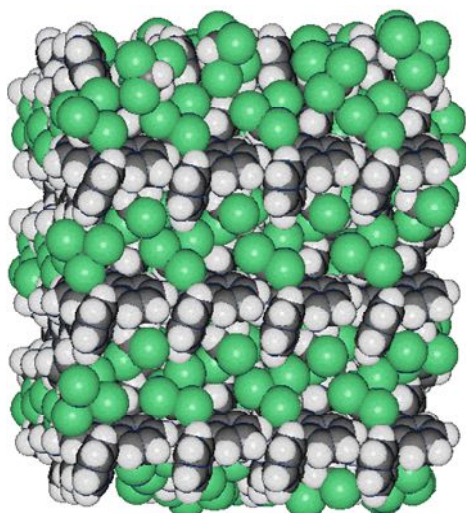

**Fig. S4** The final frame of a Monte Carlo simulation without periodic boundary conditions, *i.e.* with surfaces exposed, at room pressure. No solvent molecule is seen detaching from the crystal slab.
