# Supplementary material for: X-ray diffraction and computational studies of the pressure-dependent tetrachloroethane solvation of diphenylanthracene
Source: Royal Society of Chemistry journal article supplement (doi:10.1039/c6ce00055j), 2016-01-01
Supplement: c6ce00055j2.dfix [file c6ce00055j2.dfix]

REM Produced by Grade Web Server http://grade.globalphasing.org
REM --------- service provided by Global Phasing Ltd. ---------
REM  
REM GEN: Generated by GRADE 1.2.7 (February 19 2014)
REM GEN: from mol2 file
REM GEN: using MOGUL 1.6(RC5), CSD as535be, with quantum mechanics RM1
REM Compound InChI FCNCGHJSNVOIKE-UHFFFAOYSA-N
REM  
REM Number of restraints found:
REM Bond lengths
REM     lengths/sigmas set by mogul                30
REM     bonds to hydrogen set to neutron values    18
REM     bonds lengths set by partial QM             0
REM Bond Angles
REM     angles/sigmas set by mogul                 42
REM     non-H angles set by partial QM              0
REM     H bond angles set by partial QM            36
REM Trigonal planes (atoms bonded to 3 others that are held flat)
REM     trigonal atoms from 3 mogul bond angles     8
REM     atoms NOT trigonal from 3 mogul angles      0
REM     trigonal atoms from partial QM             18
REM     atoms not trigonal from partial QM          0
REM Torsions and 1-4 planes                                      
REM     bonds where mogul states cis/trans          0
REM     bonds mogul indicates flat                  0
REM     bonds mogul indicates 3-fold staggered      0
REM     bonds mogul indicates not flat              0
REM     in flat 5/6 membered rings after PQM       30
REM     other flat bonds after partial QM           0
REM     sp3-sp3 set 3-fold staggered by QM          0
REM     All other torsions (unrestrained)           2
REM Total charge set to 0
REM Bonds defined by QM have a sigma set to 0.030 Angs
REM Angles defined by QM have a sigma set to 3.0 degrees

REM grade-cif2shelx output 
REM Version: 0.0.5 <Dec 20 2013>
REM grade-cif2shelx extracts restraints from a grade CIF file
REM and translates them into SHELX syntax.
REM authors Oliver Smart and Julian Holstein. 

REM bonds:
DFIX 1.362 0.012 C1 C2
DFIX 1.419 0.012 C1 C6
DFIX 1.379 0.015 C2 C3
DFIX 1.362 0.012 C3 C4
DFIX 1.419 0.012 C4 C5
DFIX 1.430 0.013 C5 C6
DFIX 1.409 0.012 C5 C7
REM DFIX 1.409 0.012 C6 C7A
DFIX 1.493 0.016 C7 C8
REM DFIX 1.409 0.012 C6A C7
DFIX 1.392 0.010 C8 C9
DFIX 1.392 0.010 C13 C8
DFIX 1.384 0.010 C10 C9
DFIX 1.379 0.015 C10 C11
DFIX 1.379 0.015 C11 C12
DFIX 1.384 0.010 C12 C13
REM DFIX 1.362 0.012 C1A C2A
REM DFIX 1.419 0.012 C1A C6A
REM DFIX 1.379 0.015 C2A C3A
REM DFIX 1.362 0.012 C3A C4A
REM DFIX 1.419 0.012 C4A C5A
REM DFIX 1.430 0.013 C5A C6A
REM DFIX 1.409 0.012 C5A C7A
REM DFIX 1.493 0.016 C7A C8A
REM DFIX 1.392 0.010 C8A C9A
REM DFIX 1.392 0.010 C13A C8A
REM DFIX 1.384 0.010 C10A C9A
REM DFIX 1.379 0.015 C10A C11A
REM DFIX 1.379 0.015 C11A C12A
REM DFIX 1.384 0.010 C12A C13A

REM angles SHELX uses 1,3 distance restraints for angles,
REM these are derived by trig from the grade angle and two bond lengths:
REM C2 C1 C6 ang=121.0,0.8 b12=1.362,0.012 b23=1.419,0.012
DANG 2.421 0.018 C2 C6
REM C1 C2 C3 ang=120.4,0.7 b12=1.362,0.012 b23=1.379,0.015
DANG 2.379 0.019 C1 C3
REM C2 C3 C4 ang=120.4,0.7 b12=1.379,0.015 b23=1.362,0.012
DANG 2.379 0.019 C2 C4
REM C3 C4 C5 ang=121.0,0.8 b12=1.362,0.012 b23=1.419,0.012
DANG 2.421 0.018 C3 C5
REM C4 C5 C6 ang=118.5,0.9 b12=1.419,0.012 b23=1.430,0.013
DANG 2.448 0.019 C4 C6
REM C4 C5 C7 ang=122.4,1.0 b12=1.419,0.012 b23=1.409,0.012
DANG 2.478 0.019 C4 C7
REM C6 C5 C7 ang=119.8,0.7 b12=1.430,0.013 b23=1.409,0.012
DANG 2.456 0.018 C6 C7
REM C1 C6 C5 ang=118.5,0.9 b12=1.419,0.012 b23=1.430,0.013
DANG 2.448 0.019 C1 C5
REM C1 C6 C7A ang=122.4,1.0 b12=1.419,0.012 b23=1.409,0.012
DANG 2.478 0.019 C1 C7_$1
REM C5 C6 C7A ang=119.8,0.7 b12=1.430,0.013 b23=1.409,0.012
DANG 2.456 0.018 C5 C7_$1
REM C5 C7 C8 ang=119.5,1.8 b12=1.409,0.012 b23=1.493,0.016
DANG 2.507 0.029 C5 C8
REM C5 C7 C6A ang=120.0,1.0 b12=1.409,0.012 b23=1.409,0.012
DANG 2.440 0.019 C5 C6_$1
REM C6A C7 C8 ang=119.5,1.8 b12=1.409,0.012 b23=1.493,0.016
DANG 2.507 0.029 C6_$1 C8
REM C7 C8 C9 ang=120.9,1.7 b12=1.493,0.016 b23=1.392,0.010
DANG 2.510 0.027 C7 C9
REM C13 C8 C7 ang=120.9,1.7 b12=1.392,0.010 b23=1.493,0.016
DANG 2.510 0.027 C13 C7
REM C13 C8 C9 ang=117.8,1.2 b12=1.392,0.010 b23=1.392,0.010
DANG 2.384 0.019 C13 C9
REM C10 C9 C8 ang=120.7,0.9 b12=1.384,0.010 b23=1.392,0.010
DANG 2.413 0.016 C10 C8
REM C11 C10 C9 ang=120.3,0.9 b12=1.379,0.015 b23=1.384,0.010
DANG 2.396 0.019 C11 C9
REM C10 C11 C12 ang=119.8,1.0 b12=1.379,0.015 b23=1.379,0.015
DANG 2.386 0.022 C10 C12
REM C11 C12 C13 ang=120.3,0.9 b12=1.379,0.015 b23=1.384,0.010
DANG 2.396 0.019 C11 C13
REM C12 C13 C8 ang=120.7,0.9 b12=1.384,0.010 b23=1.392,0.010
DANG 2.413 0.016 C12 C8
REM REM C2A C1A C6A ang=121.0,0.8 b12=1.362,0.012 b23=1.419,0.012
REM DANG 2.421 0.018 C2A C6A
REM REM C1A C2A C3A ang=120.4,0.7 b12=1.362,0.012 b23=1.379,0.015
REM DANG 2.379 0.019 C1A C3A
REM REM C2A C3A C4A ang=120.4,0.7 b12=1.379,0.015 b23=1.362,0.012
REM DANG 2.379 0.019 C2A C4A
REM REM C3A C4A C5A ang=121.0,0.8 b12=1.362,0.012 b23=1.419,0.012
REM DANG 2.421 0.018 C3A C5A
REM REM C4A C5A C6A ang=118.5,0.9 b12=1.419,0.012 b23=1.430,0.013
REM DANG 2.448 0.019 C4A C6A
REM REM C4A C5A C7A ang=122.4,1.0 b12=1.419,0.012 b23=1.409,0.012
REM DANG 2.478 0.019 C4A C7A
REM REM C6A C5A C7A ang=119.8,0.7 b12=1.430,0.013 b23=1.409,0.012
REM DANG 2.456 0.018 C6A C7A
REM REM C1A C6A C7 ang=122.4,1.0 b12=1.419,0.012 b23=1.409,0.012
REM DANG 2.478 0.019 C1A C7
REM REM C5A C6A C7 ang=119.8,0.7 b12=1.430,0.013 b23=1.409,0.012
REM DANG 2.456 0.018 C5A C7
REM REM C1A C6A C5A ang=118.5,0.9 b12=1.419,0.012 b23=1.430,0.013
REM DANG 2.448 0.019 C1A C5A
REM REM C5A C7A C6 ang=120.0,1.0 b12=1.409,0.012 b23=1.409,0.012
REM DANG 2.440 0.019 C5A C6
REM REM C6 C7A C8A ang=119.5,1.8 b12=1.409,0.012 b23=1.493,0.016
REM DANG 2.507 0.029 C6 C8A
REM REM C5A C7A C8A ang=119.5,1.8 b12=1.409,0.012 b23=1.493,0.016
REM DANG 2.507 0.029 C5A C8A
REM REM C7A C8A C9A ang=120.9,1.7 b12=1.493,0.016 b23=1.392,0.010
REM DANG 2.510 0.027 C7A C9A
REM REM C13A C8A C7A ang=120.9,1.7 b12=1.392,0.010 b23=1.493,0.016
REM DANG 2.510 0.027 C13A C7A
REM REM C13A C8A C9A ang=117.8,1.2 b12=1.392,0.010 b23=1.392,0.010
REM DANG 2.384 0.019 C13A C9A
REM REM C10A C9A C8A ang=120.7,0.9 b12=1.384,0.010 b23=1.392,0.010
REM DANG 2.413 0.016 C10A C8A
REM REM C11A C10A C9A ang=120.3,0.9 b12=1.379,0.015 b23=1.384,0.010
REM DANG 2.396 0.019 C11A C9A
REM REM C10A C11A C12A ang=119.8,1.0 b12=1.379,0.015 b23=1.379,0.015
REM DANG 2.386 0.022 C10A C12A
REM REM C11A C12A C13A ang=120.3,0.9 b12=1.379,0.015 b23=1.384,0.010
REM DANG 2.396 0.019 C11A C13A
REM REM C12A C13A C8A ang=120.7,0.9 b12=1.384,0.010 b23=1.392,0.010
REM DANG 2.413 0.016 C12A C8A

REM REM planes: 
REM REM plane csd-C5
REM FLAT C5 C4 C6 C7
REM REM plane csd-C5A
REM FLAT C5A C4A C6A C7A
REM REM plane csd-C6
REM FLAT C6 C1 C5 C7A
REM REM plane csd-C6A
REM FLAT C6A C7 C1A C5A
REM REM plane csd-C7
REM FLAT C7 C5 C8 C6A
REM REM plane csd-C7A
REM FLAT C7A C6 C5A C8A
REM REM plane csd-C8
REM FLAT C8 C7 C9 C13
REM REM plane csd-C8A
REM FLAT C8A C7A C9A C13A
REM REM plane ring6A-1
REM FLAT C1 C2 C3 C4
REM REM plane ring6A-2
REM FLAT C2 C3 C4 C5
REM REM plane ring6A-3
REM FLAT C3 C4 C5 C6
REM REM plane ring6A-4
REM FLAT C4 C5 C6 C1
REM REM plane ring6A-5
REM FLAT C5 C6 C1 C2
REM REM plane ring6A-6
REM FLAT C6 C1 C2 C3
REM REM plane ring6B-1
REM FLAT C5 C6 C7A C5A
REM REM plane ring6B-2
REM FLAT C6 C7A C5A C6A
REM REM plane ring6B-3
REM FLAT C7A C5A C6A C7
REM REM plane ring6B-4
REM FLAT C5A C6A C7 C5
REM REM plane ring6B-5
REM FLAT C6A C7 C5 C6
REM REM plane ring6B-6
REM FLAT C7 C5 C6 C7A
REM REM plane ring6C-1
REM FLAT C8 C9 C10 C11
REM REM plane ring6C-2
REM FLAT C9 C10 C11 C12
REM REM plane ring6C-3
REM FLAT C10 C11 C12 C13
REM REM plane ring6C-4
REM FLAT C11 C12 C13 C8
REM REM plane ring6C-5
REM FLAT C12 C13 C8 C9
REM REM plane ring6C-6
REM FLAT C13 C8 C9 C10
REM REM plane ring6D-1
REM FLAT C1A C2A C3A C4A
REM REM plane ring6D-2
REM FLAT C2A C3A C4A C5A
REM REM plane ring6D-3
REM FLAT C3A C4A C5A C6A
REM REM plane ring6D-4
REM FLAT C4A C5A C6A C1A
REM REM plane ring6D-5
REM FLAT C5A C6A C1A C2A
REM REM plane ring6D-6
REM FLAT C6A C1A C2A C3A
REM REM plane ring6E-1
REM FLAT C8A C9A C10A C11A
REM REM plane ring6E-2
REM FLAT C9A C10A C11A C12A
REM REM plane ring6E-3
REM FLAT C10A C11A C12A C13A
REM REM plane ring6E-4
REM FLAT C11A C12A C13A C8A
REM REM plane ring6E-5
REM FLAT C12A C13A C8A C9A
REM REM plane ring6E-6
REM FLAT C13A C8A C9A C10A
