# Supplementary material for: X-ray diffraction and computational studies of the pressure-dependent tetrachloroethane solvation of diphenylanthracene
Source: Royal Society of Chemistry journal article supplement (doi:10.1039/c6ce00055j), 2016-01-01
Supplement: c6ce00055j3.dfix [file c6ce00055j3.dfix]

REM Produced by Grade Web Server http://grade.globalphasing.org
REM --------- service provided by Global Phasing Ltd. ---------
REM  
REM GEN: Generated by GRADE 1.2.7 (February 19 2014)
REM GEN: from mol2 file
REM GEN: using MOGUL 1.6(RC5), CSD as535be, with quantum mechanics RM1
REM Compound InChI QPFMBZIOSGYJDE-UHFFFAOYSA-N
REM  
REM Number of restraints found:
REM Bond lengths
REM     lengths/sigmas set by mogul                 5
REM     bonds to hydrogen set to neutron values     2
REM     bonds lengths set by partial QM             0
REM Bond Angles
REM     angles/sigmas set by mogul                  6
REM     non-H angles set by partial QM              0
REM     H bond angles set by partial QM             6
REM Trigonal planes (atoms bonded to 3 others that are held flat)
REM     trigonal atoms from 3 mogul bond angles     0
REM     atoms NOT trigonal from 3 mogul angles      0
REM     trigonal atoms from partial QM              0
REM     atoms not trigonal from partial QM          0
REM Torsions and 1-4 planes                                      
REM     bonds where mogul states cis/trans          1
REM     bonds mogul indicates flat                  0
REM     bonds mogul indicates 3-fold staggered      1
REM     bonds mogul indicates not flat              0
REM     in flat 5/6 membered rings after PQM        0
REM     other flat bonds after partial QM           0
REM     sp3-sp3 set 3-fold staggered by QM          0
REM     All other torsions (unrestrained)           0
REM Total charge set to 0
REM Bonds defined by QM have a sigma set to 0.030 Angs
REM Angles defined by QM have a sigma set to 3.0 degrees

REM grade-cif2shelx output 
REM Version: 0.0.5 <Dec 20 2013>
REM grade-cif2shelx extracts restraints from a grade CIF file
REM and translates them into SHELX syntax.
REM authors Oliver Smart and Julian Holstein. 

REM bonds:
DFIX 1.777 0.028 C1CL CL1
DFIX 1.777 0.028 C1CL CL2
DFIX 1.777 0.028 C2CL CL3
DFIX 1.777 0.028 C2CL CL4
DFIX 1.476 0.061 C1CL C2CL

REM angles SHELX uses 1,3 distance restraints for angles,
REM these are derived by trig from the grade angle and two bond lengths:
REM CL1 C1CL CL2 ang=110.6,2.7 b12=1.777,0.028 b23=1.777,0.028
DANG 2.922 0.058 CL1 CL2
REM C2CL C1CL CL1 ang=110.7,3.3 b12=1.476,0.061 b23=1.777,0.028
DANG 2.682 0.075 C2CL CL1
REM C2CL C1CL CL2 ang=110.7,3.3 b12=1.476,0.061 b23=1.777,0.028
DANG 2.682 0.075 C2CL CL2
REM CL3 C2CL CL4 ang=110.6,2.7 b12=1.777,0.028 b23=1.777,0.028
DANG 2.922 0.058 CL3 CL4
REM C1CL C2CL CL3 ang=110.7,3.3 b12=1.476,0.061 b23=1.777,0.028
DANG 2.682 0.075 C1CL CL3
REM C1CL C2CL CL4 ang=110.7,3.3 b12=1.476,0.061 b23=1.777,0.028
DANG 2.682 0.075 C1CL CL4
